# Supplementary material for: Prediction of plasma ctDNA fraction and prognostic implications of liquid biopsy in advanced prostate cancer
Source: PubMed Central journal article supplement (PMC10902374; doi:10.1038/s41467-024-45475-w), 2024-02-28
Supplement: 41467_2024_45475_MOESM1_ESM.pdf [file 41467_2024_45475_MOESM1_ESM.pdf]

# Prediction of plasma ctDNA fraction and prognostic implications of liquid biopsy in advanced prostate cancer: **Supplementary Information**

Nicolette M. Fonseca<sup>†1</sup>, Corinne Maurice-Dror<sup>†2</sup>, Cameron Herberts<sup>†1</sup>, Wilson Tu<sup>1</sup>, William Fan<sup>2</sup>, Andrew J. Murtha<sup>1</sup>, Catarina Kollmannsberger<sup>2</sup>, Edmond M. Kwan<sup>1,2,3</sup>, Karan Parekh<sup>1</sup>, Elena Schönlaui<sup>1</sup>, Cecily Q. Bernales<sup>1</sup>, Gráinne Donnellan<sup>1</sup>, Sarah W. S. Ng<sup>1</sup>, Takayuki Sumiyoshi<sup>1,4</sup>, Joanna Vergidis<sup>5</sup>, Krista Noonan<sup>6</sup>, Daygen L. Finch<sup>7</sup>, Muhammad Zulfiqar<sup>8</sup>, Stacy Miller<sup>9</sup>, Sunil Parimi<sup>2</sup>, Jean-Michel Lavoie<sup>5</sup>, Edward Hardy<sup>10</sup>, Maryam Soleimani<sup>2</sup>, Lucia Nappi<sup>1,2</sup>, Bernhard J. Eigel<sup>2</sup>, Christian Kollmannsberger<sup>2</sup>, Sinja Taavitsainen<sup>11</sup>, Matti Nykter<sup>11</sup>, Sofie H. Tolmeijer<sup>1,12</sup>, Emmy Boerrigter<sup>13</sup>, Niven Mehra<sup>12</sup>, Nielka P. van Erp<sup>13</sup>, Bram De Laere<sup>14,15,16</sup>, Johan Lindberg<sup>16</sup>, Henrik Grönberg<sup>16</sup>, Daniel J. Khalaf<sup>2</sup>, Matti Annala<sup>1,11\*</sup>, Kim N. Chi<sup>1,2\*</sup>, Alexander W. Wyatt<sup>1,17\*</sup>

<sup>1</sup>Vancouver Prostate Centre, Department of Urologic Sciences, University of British Columbia, British Columbia, Canada; <sup>2</sup>Department of Medical Oncology, BC Cancer, Vancouver, British Columbia, Canada; <sup>3</sup>Department of Medicine, School of Clinical Sciences; Monash University; Melbourne, Victoria, Australia; <sup>4</sup>Department of Urology, Graduate School of Medicine, Kyoto University, Kyoto, Japan; <sup>5</sup>Department of Medical Oncology, BC Cancer, Victoria, British Columbia, Canada; <sup>6</sup>Department of Medical Oncology, BC Cancer, Surrey, British Columbia, Canada; <sup>7</sup>Department of Medical Oncology, BC Cancer, Kelowna, British Columbia, Canada; <sup>8</sup>Department of Medical Oncology, BC Cancer, Abbotsford, British Columbia, Canada; <sup>9</sup>Department of Radiation Oncology, BC Cancer, Prince George, British Columbia, Canada; <sup>10</sup>Tom McMurtry & Peter Baerg Cancer Centre, Vernon Jubilee Hospital, British Columbia Canada. <sup>11</sup>Prostate Cancer Research Center, Faculty of Medicine and Health Technology, Tampere University and Tays Cancer Center, Tampere, Finland; <sup>12</sup>Department of Medical Oncology, Research Institute for Medical Innovation, Radboud University, Nijmegen, The Netherlands; <sup>13</sup>Department of Pharmacy, Research Institute for Medical Innovation, Radboud University, Nijmegen, The Netherlands; <sup>14</sup>Department of Human Structure and Repair, Ghent University, Ghent, Belgium; <sup>15</sup>Cancer Research Institute Ghent (CRIG), Ghent University, Ghent, Belgium; <sup>16</sup>Department of Medical Epidemiology and Biostatistics, Karolinska Institute, Stockholm, Sweden; <sup>17</sup>Michael Smith Genome Sciences Centre, BC Cancer, Vancouver, British Columbia, Canada

**†These authors contributed equally to this work.**

**\*These authors have jointly supervised this work.**

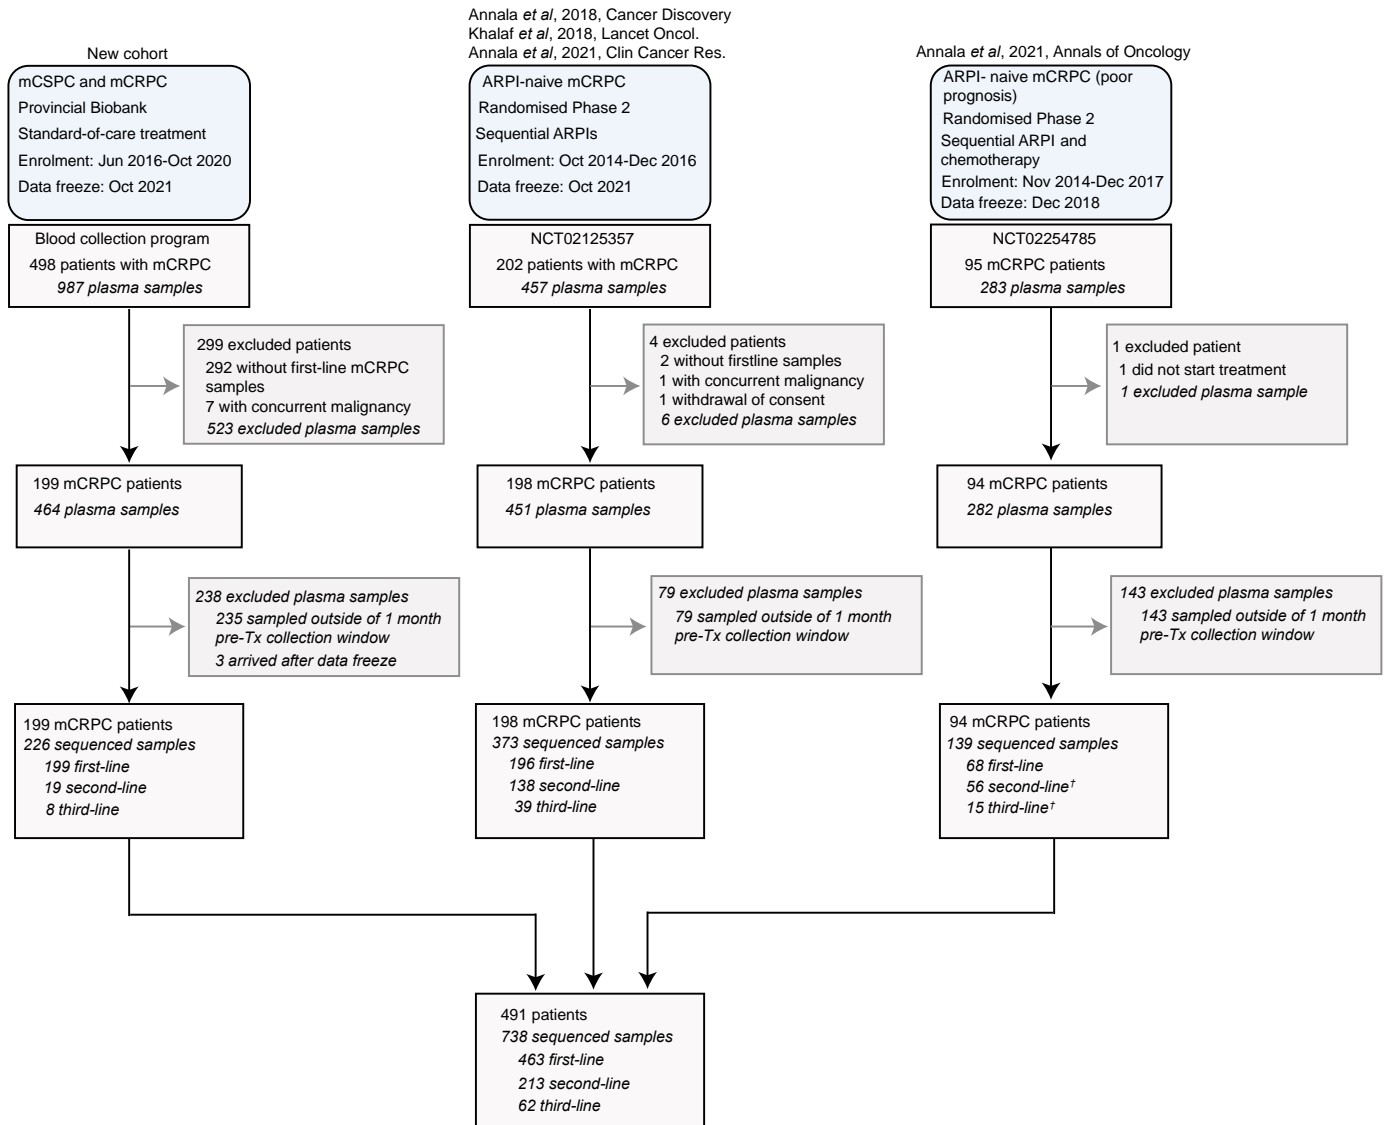

† Patients enrolled in OZM-054 were permitted to receive one prior course of docetaxel. 26 patients received one prior course of docetaxel prior to trial enrolment and therefore eligible on-trial samples collected from these patients were analysed as second-line (n = 26) or subsequently third-line at crossover (n = 15).

**Supplementary Fig. 1. CONSORT flow diagram.** Upright and italicized text refer to the number of available patients and samples at each step, respectively.

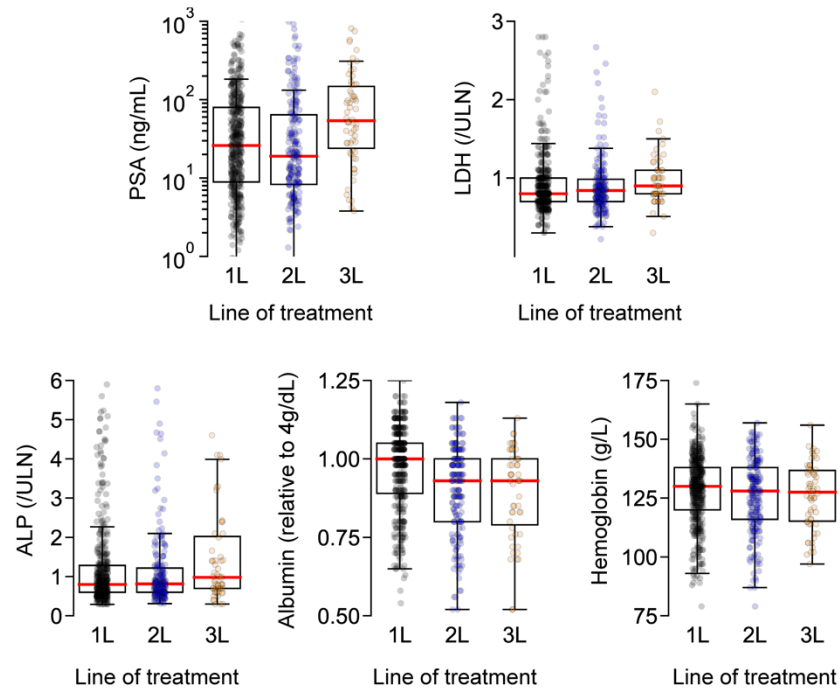

**Supplementary Fig. 2. Per treatment-line distribution of additional clinical prognostic markers in our cohort.** All variables are measured at time of line-specific mCRPC treatment initiation. See **Supplementary Data 3** for number of patients with evaluable data matched to each line of treatment.

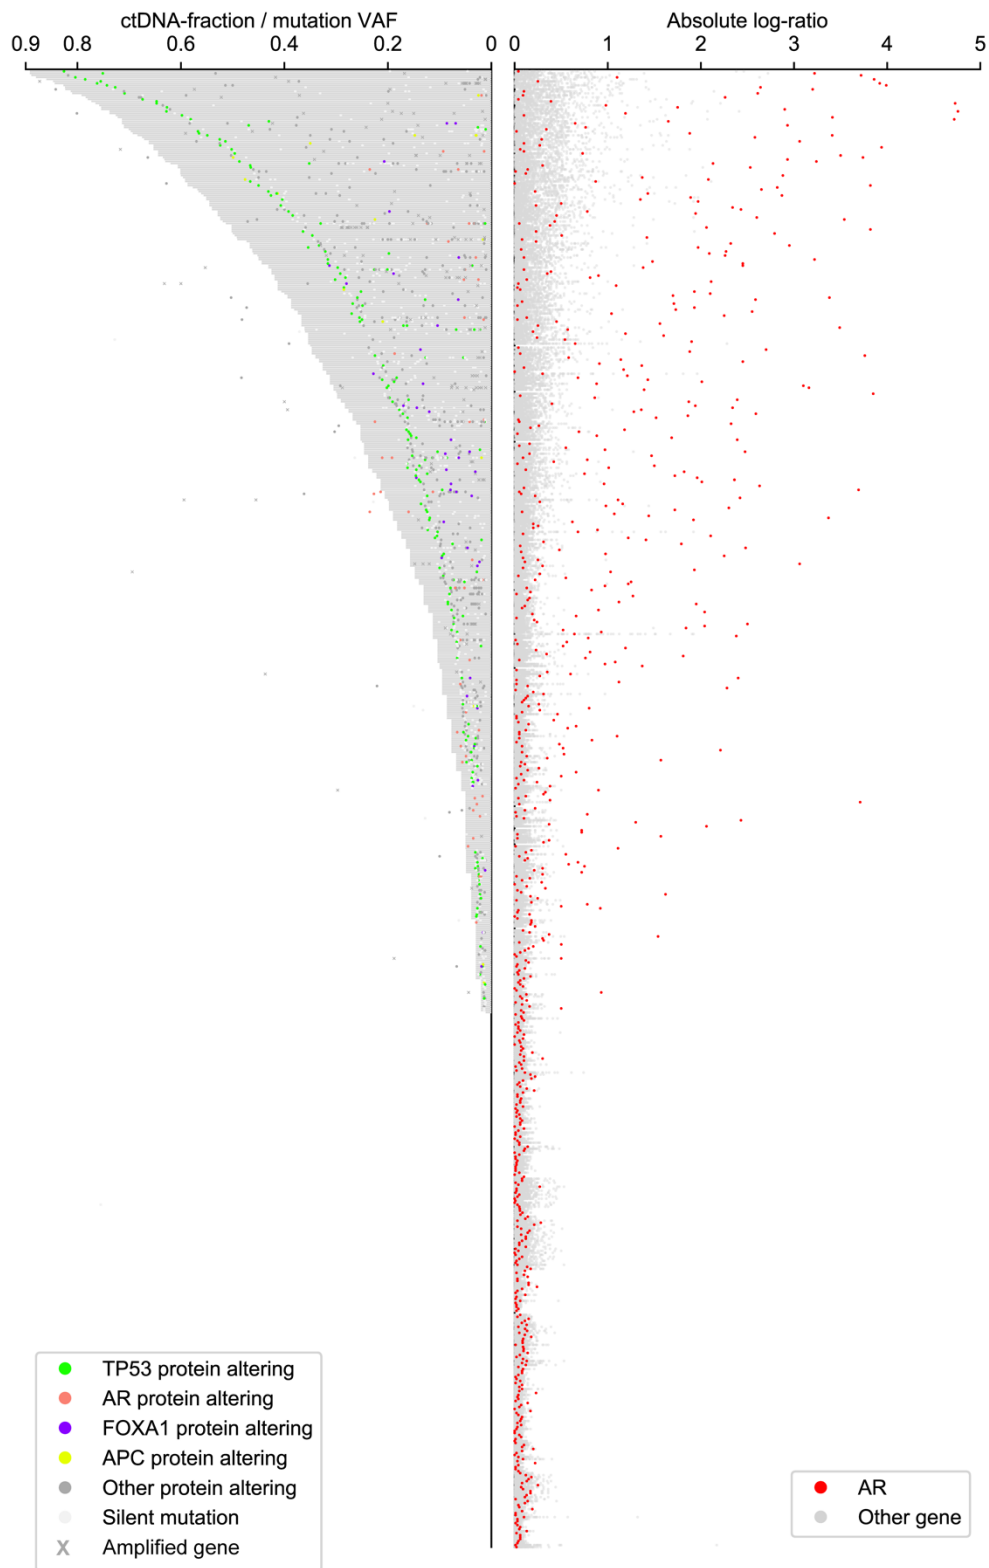

**Supplementary Fig. 3.** Mutation and copy-number evidence for ctDNA%. All somatic mutations, copy number alterations (via absolute log-ratio), and ctDNA fractions are plotted per sample (row). Mutations occurring on amplified genes are marked as X.

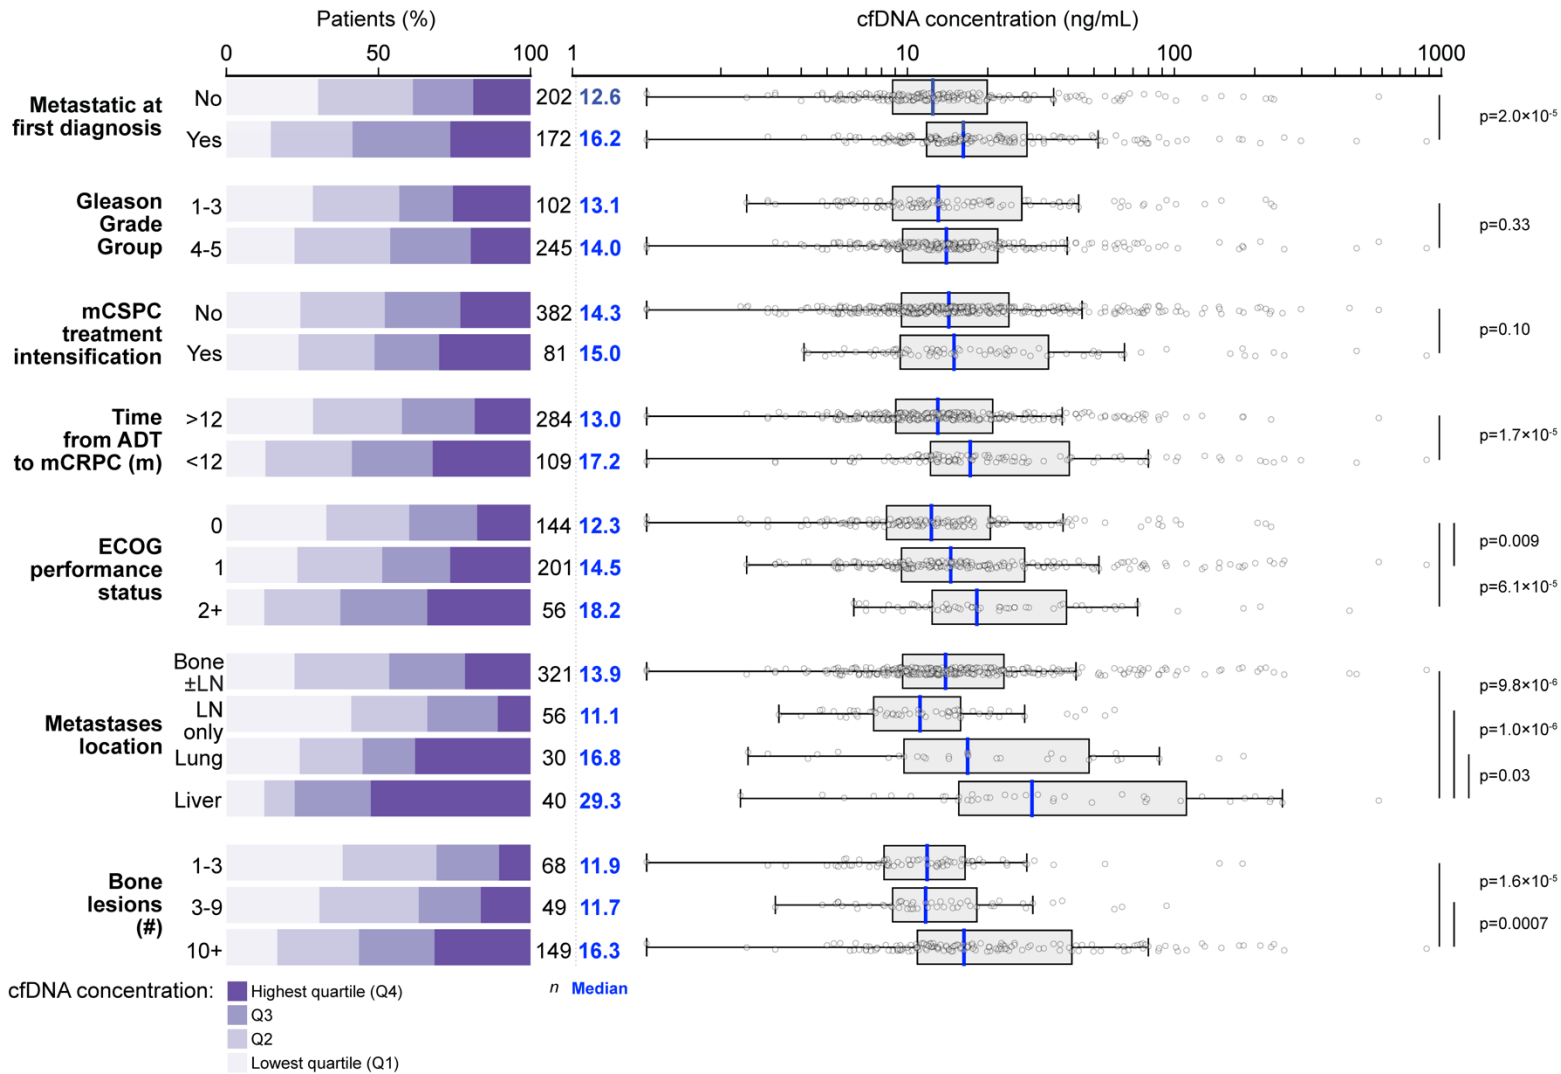

**Supplementary Fig. 4. Serum and radiographic prognostic clinical features correlate with baseline cfDNA concentration.** Fraction of patients per cfDNA concentration quartile (left) and cfDNA concentration as a continuous variable (right) across various categorical clinical subgroups (identical to those used in **Figure 2**).

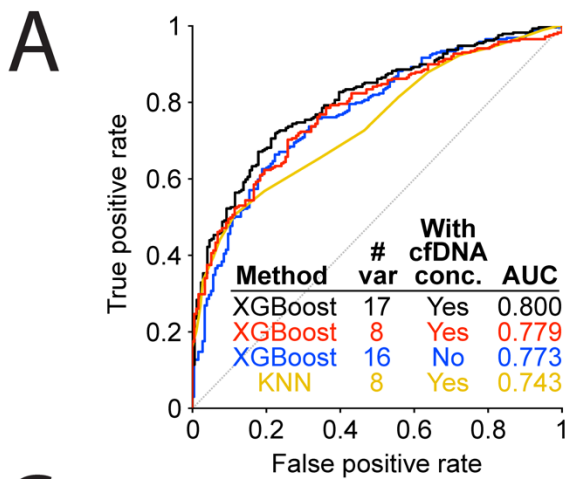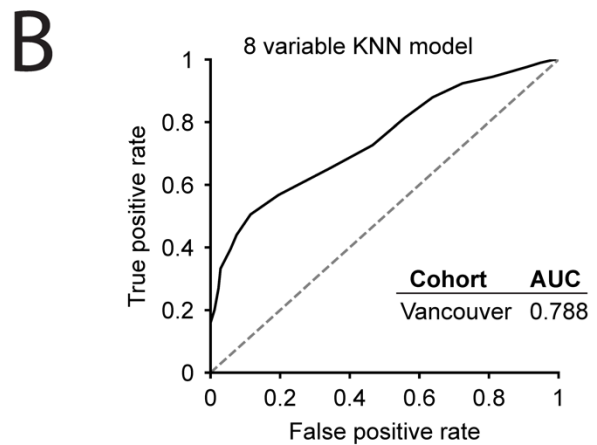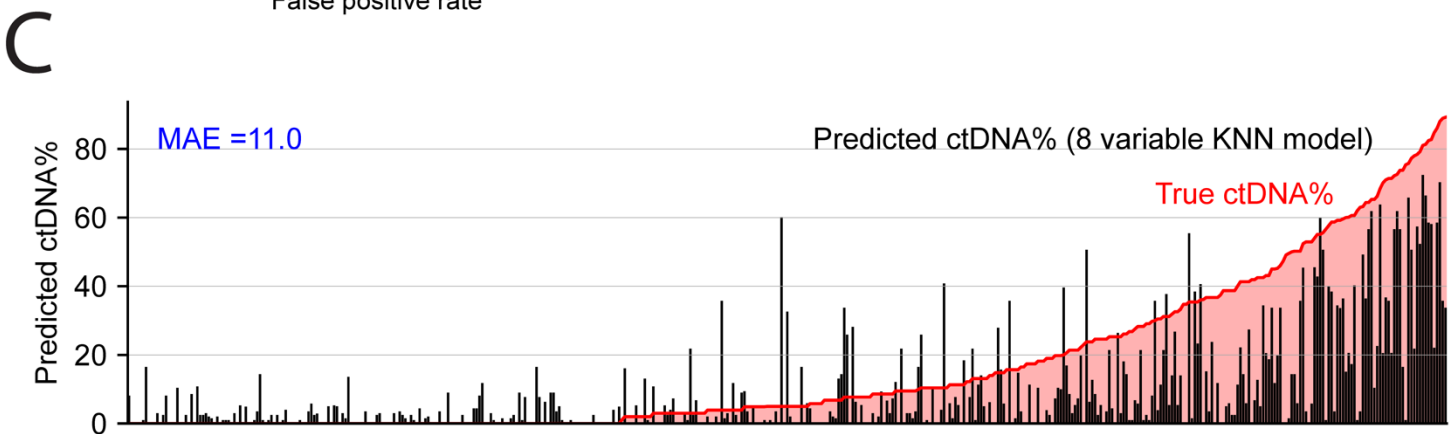

**Supplementary Fig. 5. K-nearest neighbor prediction of ctDNA%.** Receiver operating characteristic curves for (a) four separately trained and optimized XGBoost or K-nearest neighbor (KNN) prediction models evaluating different sets of clinical input features. (b) KNN prediction model with 8 routinely measured clinical variables. (c) KNN regression model with 8 clinical variables. Red curve shows ground-truth ctDNA% (i.e. from DNA sequencing). MAE = mean absolute error.

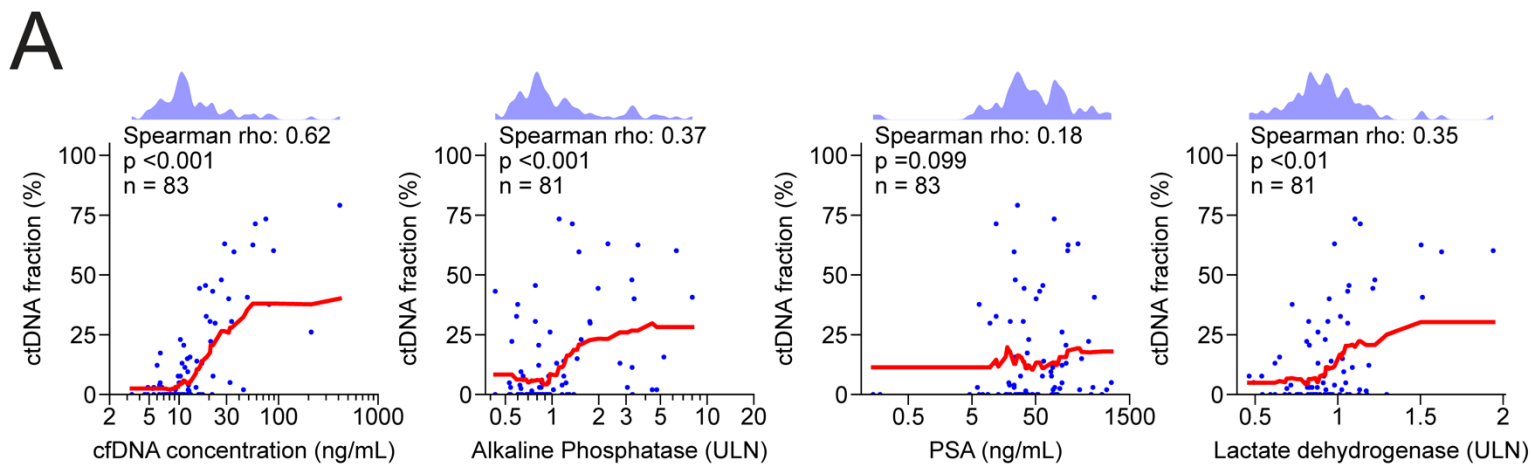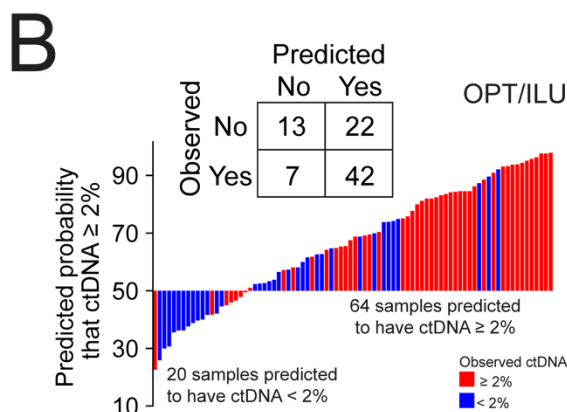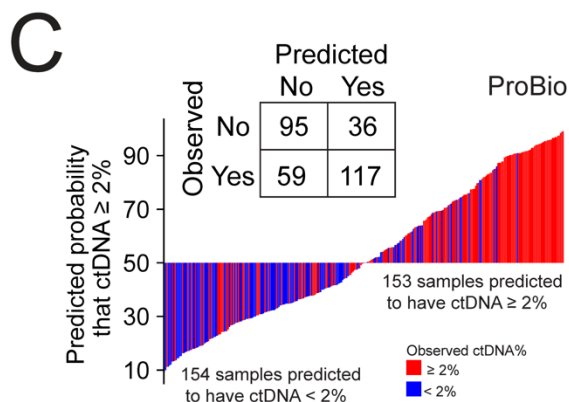

**Supplementary Fig. 6. Validation of 8-feature XGBoost prediction of ctDNA%.** (a)

Correlation between ctDNA% and four continuous prognostic serum markers reported in the OPTIMUM & ILLUMINATE trial datasets. K-nearest neighbor regression (neighbors=20 with uniform weights; red line) is used to nonparametrically visualize each bivariate relationship. Kernel density estimates shown above. (b-c) Predicted probability of ctDNA≥2% based on the 8-feature XGBoost model applied to the OPTIMUM & ILLUMINATE (n=84) and ProBio (n=307) trial validation cohorts. True observed ctDNA≥2% status is indicated with color. In-set confusion matrix for classification of ctDNA≥2%.

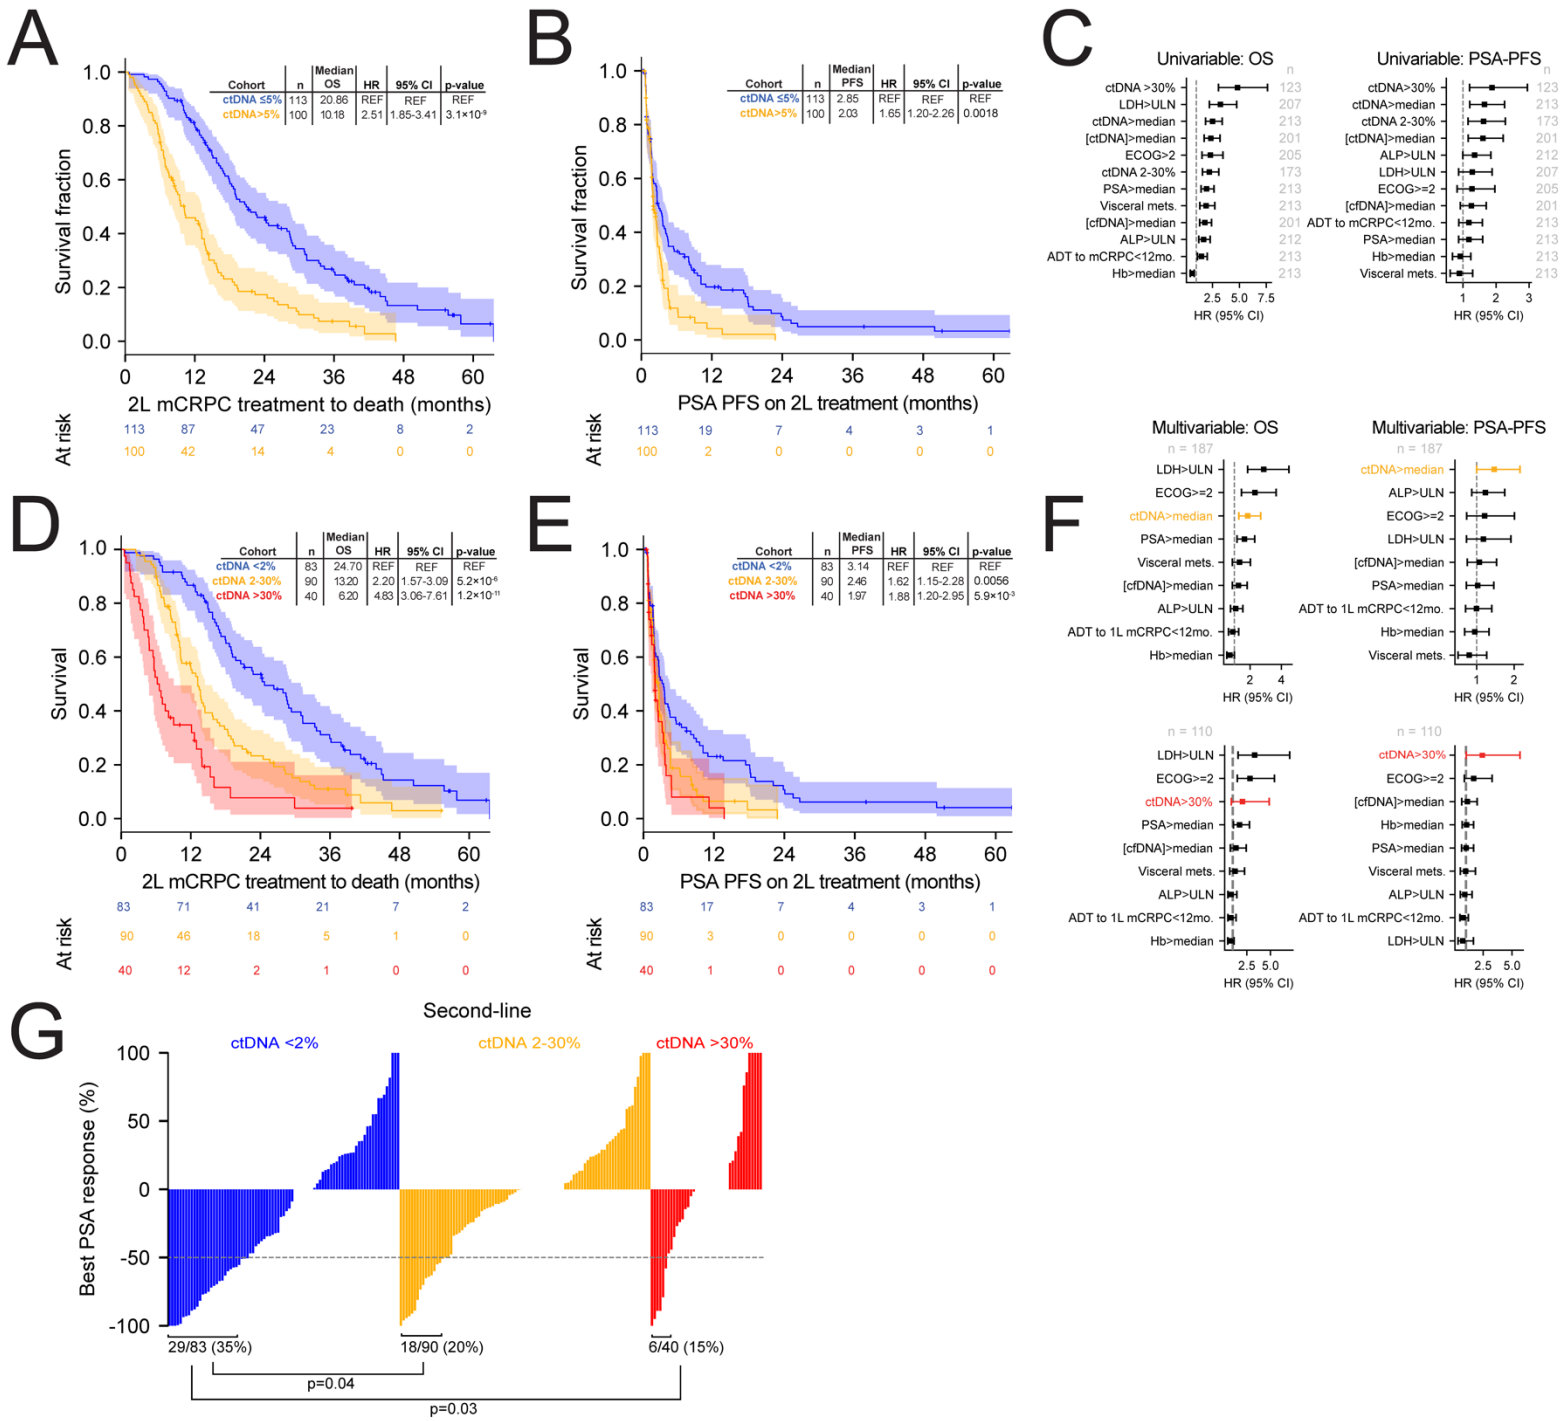

**Supplementary Fig. 7. ctDNA% and clinical outcomes measured at initiation of second-line therapy.** Kaplan-Meier estimates of time from initiation of second-line systemic therapy for mCRPC to death or last follow-up (**a+d**) and PSA progression-free survival on second-line therapy (**b+e**) stratified by synchronously-measured ctDNA% dichotomized by median (**a+b**) or by predefined bins (high, low, undetectable) (**d+e**). Shading indicates 95% confidence intervals; in-set tables show univariable HRs. Forest plots show HRs and 95% confidence intervals from univariable (**c**) and multivariable (**f**) Cox proportional hazard regression models incorporating ctDNA% plus additional clinical prognostic markers. (**g**) Waterfall plot showing best PSA response (relative to baseline PSA) on second-line mCRPC therapy stratified by baseline ctDNA% (ctDNA>30%, ctDNA 2-30%, and ctDNA<2%). P-values reflect Fisher's Exact Test's comparing the proportion of patients achieving a ≥50% PSA response across ctDNA categories.



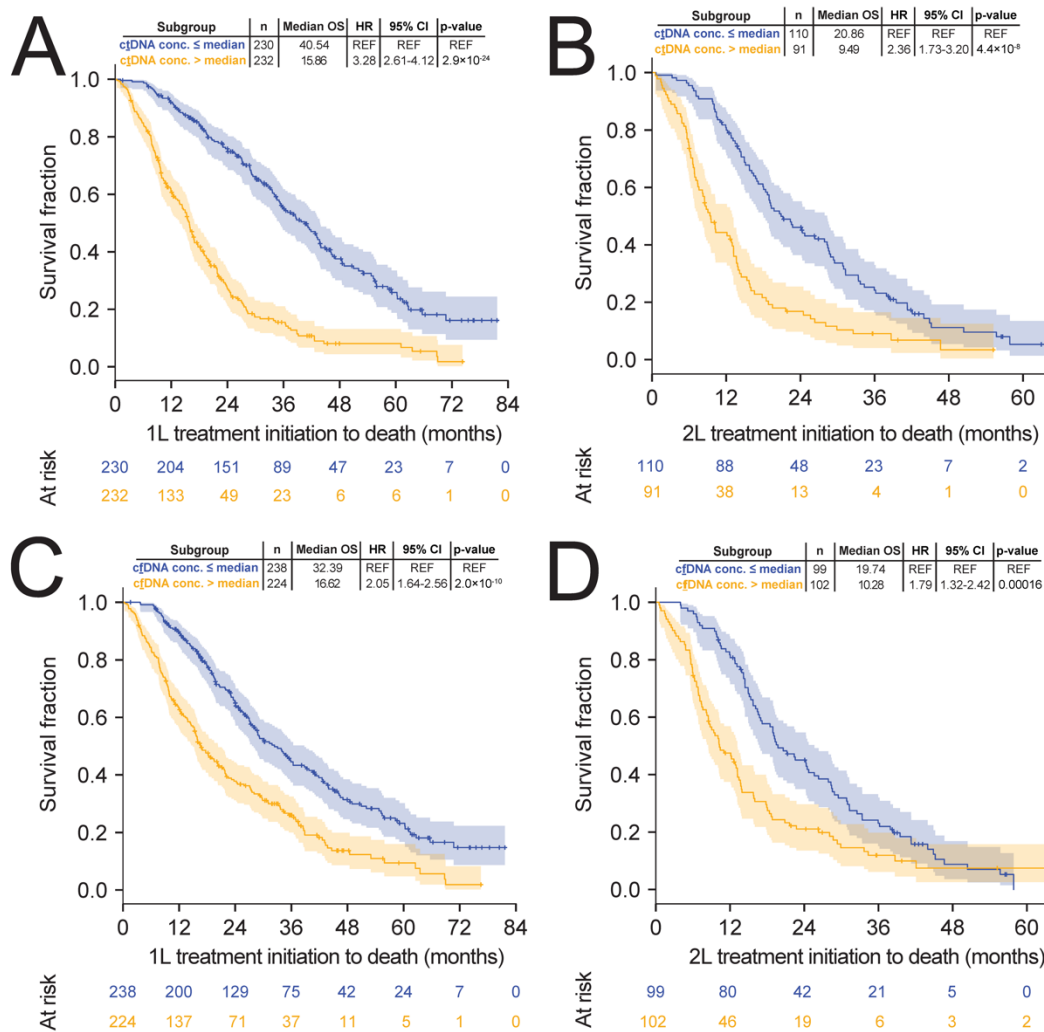

**Supplementary Fig. 8. Prognostic relevance of baseline ctDNA and cfDNA concentration.** Kaplan-Meier estimates of time from initiation of first and second-line systemic therapy for mCRPC to death or last follow-up stratified by synchronously measured ctDNA concentration (**a+b**) or cfDNA concentration (**c+d**) dichotomised by median. Shading indicates 95% confidence intervals.

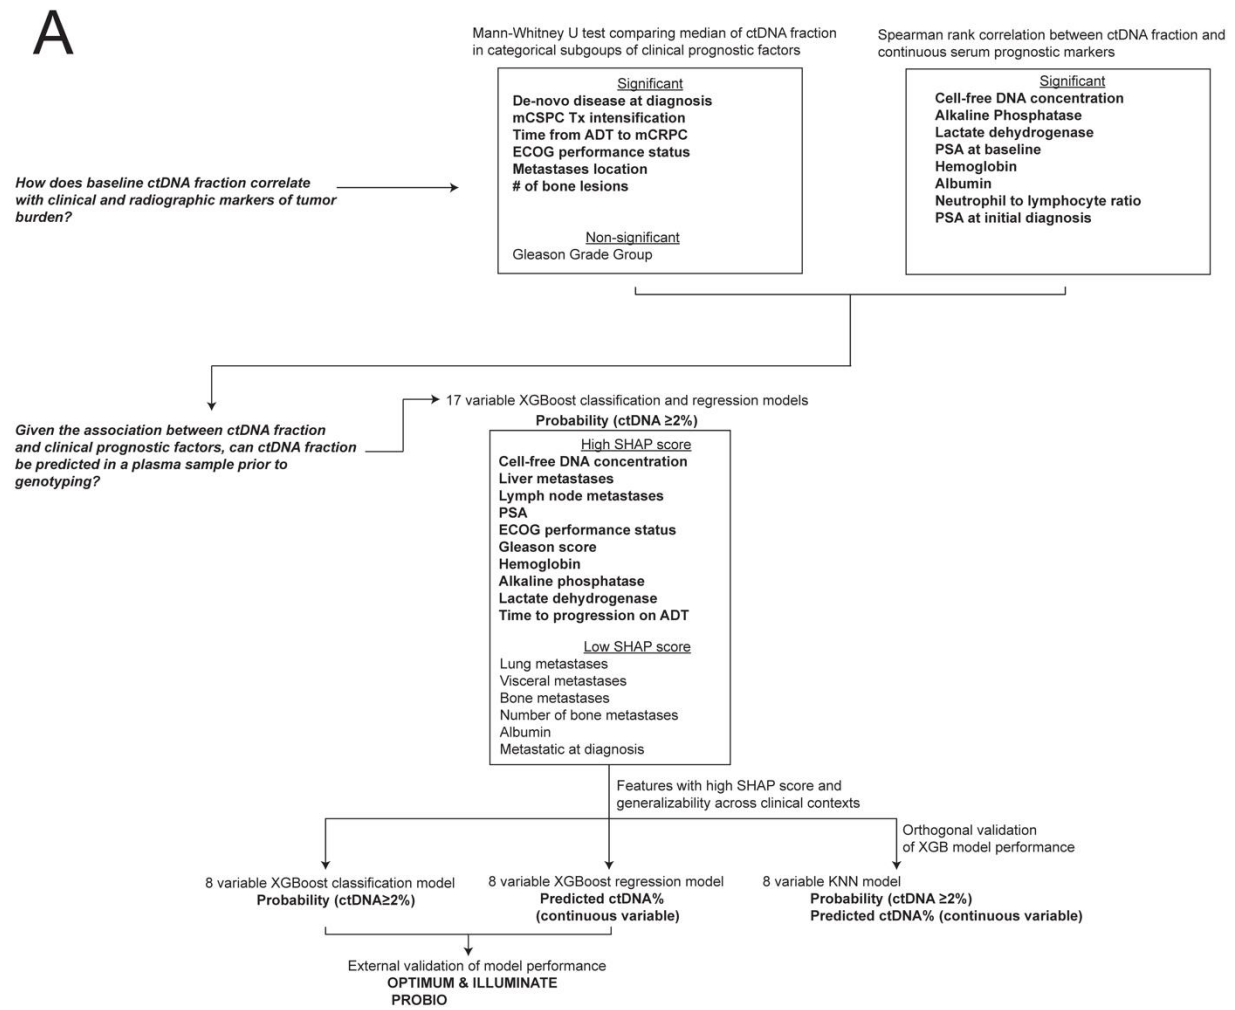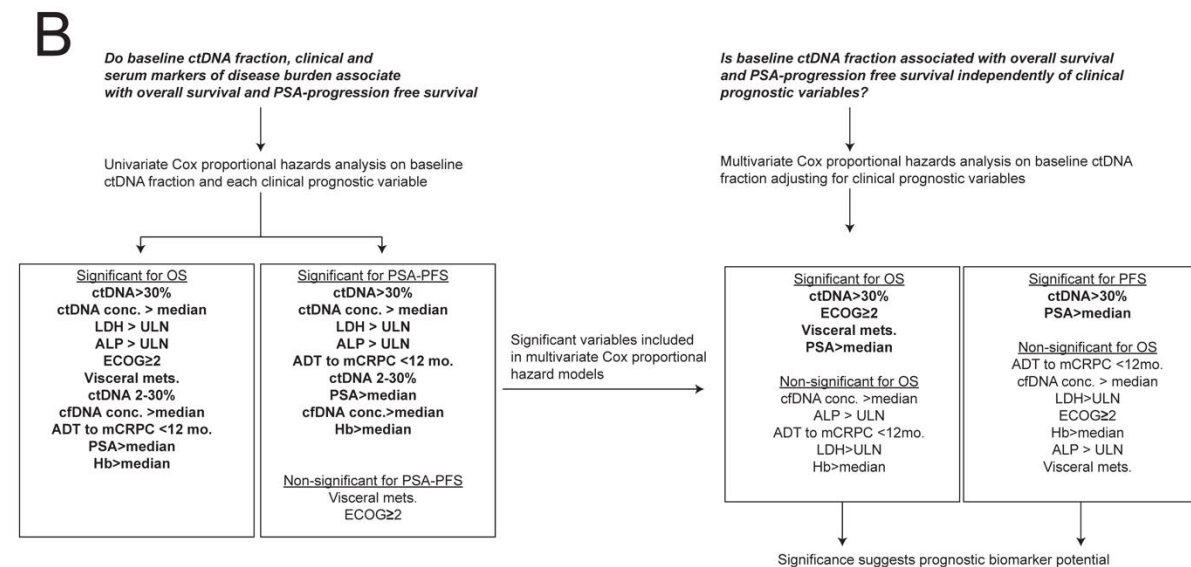

**Supplementary Fig. 9. Statistical framework for evaluating the relationship between ctDNA fraction, clinical variables, and mCRPC survival outcomes.** Flowchart showing the overarching experimental design and statistical approach for the manuscript's central objectives: (a) quantifying the association between ctDNA% and clinical markers of tumor burden and leveraging this information to develop a point-of-care ctDNA%-prediction tool, and (b) investigating the prognostic significance of measured ctDNA%.
