# Supplementary material for: Prediction of plasma ctDNA fraction and prognostic implications of liquid biopsy in advanced prostate cancer
Source: PubMed Central journal article supplement (PMC10902374; doi:10.1038/s41467-024-45475-w), 2024-02-28
Supplement: 41467_2024_45475_MOESM3_ESM.pdf [file 41467_2024_45475_MOESM3_ESM.pdf]

## Description of Additional Supplementary Files

### **Supplementary Data Legends**

**Supplementary Data 1:** List of clinical variables collected for all 491 mCRPC patients, grouped according to prostate cancer clinical setting.

**Supplementary Data 2:** Per patient/sample ctDNA fraction estimates.

**Supplementary Data 3:** Event rates for PSA-PFS and OS and summary of missing clinical data (per initiating line of therapy).

**Supplementary Data 4:** Univariable Cox proportional hazards model for overall survival and PSA-PFS. Hazard ratios, upper and lower 95% confidence intervals, and (unadjusted) p-values are displayed.

**Supplementary Data 5:** Multivariable Cox proportional hazard model for overall survival and PSA-PFS. Hazard ratios, upper and lower 95% confidence intervals, and (unadjusted) p-values are displayed.

**Supplementary Data 6:** Clinical variables used for training XGBoost and KNN models to predict ctDNA% and model performance metrics.
